# Supplementary material
Source: MDPI journal article supplement (https://www.mdpi.com/2227-9040/10/10/393)
Supplement: s1 [file s1]

# Design and characterization of ITO-covered resonant nanopillars for dual optical and electrochemical sensing

Luca Tramarin<sup>1,2,3</sup>, Rafael Casquel<sup>1,2,3</sup>, Jorge Gil-Rostra<sup>4</sup>, Miguel Ángel González-Martínez<sup>5</sup>, Raquel Herrero-Labrador<sup>1,3</sup>, Ana María M. Murillo<sup>1,2,3</sup>, María Fe Laguna<sup>1,2,3</sup>, María-José Bañuls<sup>5</sup>, Agustín R. Gonzalez-Elipe<sup>4</sup>, and Miguel Holgado<sup>1,2,3,\*</sup>

- <sup>1</sup> Optics, Photonics and Biophotonics Group, Centro de Tecnología Biomédica, Campus de Montegancedo, Universidad Politécnica de Madrid (UPM), Pozuelo de Alarcón, Madrid 28223, Spain
  - <sup>2</sup> Departamento de Física Aplicada e Ingeniería de Materiales, Escuela Técnica Superior de Ingenieros Industriales, Universidad Politécnica de Madrid (UPM), C/ José Gutiérrez Abascal 2, Madrid 28006, Spain
  - <sup>3</sup> Group of Organ and Tissue on-a-chip and In-Vitro Detection, Instituto de Investigación Sanitaria del Hospital Clínico San Carlos, IdISSC, C/ Profesor Martín Lagos s/n, 4ª Planta Sur, Madrid 28040, Spain
  - <sup>4</sup> Nanotechnology on Surfaces Group, Instituto de Ciencia de Materiales de Sevilla (ICMS-US-CSIC), Américo Vespucio 49, Seville 41092, Spain
  - <sup>5</sup> Instituto Interuniversitario de Investigación de Reconocimiento Molecular y Desarrollo Tecnológico (IDM), Departamento de Química, Universitat Politècnica de València, Camino de Vera s/n, Valencia 46022, Spain
- \* Correspondence: m.holgado@upm.es

**Table S1.** Complete data of Bulk Sensing experiment for R-NPs.

| R-NPs array | Resonance position [nm] and corresponding uncertainty for liquids used |      |        |      |         |      |             |      |            |      |             |      |
|-------------|------------------------------------------------------------------------|------|--------|------|---------|------|-------------|------|------------|------|-------------|------|
|             | Methanol                                                               |      | H2O    |      | Ethanol |      | Acetic Acid |      | 2-propanol |      | Cyclohexane |      |
| 5-B10_A     | 579.60                                                                 | 0.17 | 579.88 | 0.05 | 588.63  | 0.12 | 591.12      | 0.11 | 593.09     | 0.10 | 607.61      | 0.15 |
| 5-B10_B     | 579.90                                                                 | 0.13 | 580.05 | 0.05 | 588.94  | 0.06 | 591.66      | 0.10 | 593.40     | 0.07 | 608.23      | 0.09 |
| 5-B10_C     | 580.86                                                                 | 0.12 | 580.95 | 0.05 | 589.76  | 0.08 | 591.97      | 0.13 | 593.58     | 0.07 | 608.43      | 0.09 |
| 5-B10_D     | 580.68                                                                 | 0.15 | 580.70 | 0.05 | 589.68  | 0.08 | 592.32      | 0.10 | 593.81     | 0.07 | 608.74      | 0.05 |
| 5-B10_E     | 579.75                                                                 | 0.14 | 579.57 | 0.05 | 588.60  | 0.06 | 591.31      | 0.09 | 592.67     | 0.05 | 607.64      | 0.09 |
| 5-B10_F     | 580.43                                                                 | 0.13 | 580.19 | 0.05 | 589.19  | 0.08 | 591.99      | 0.10 | 593.23     | 0.06 | 608.23      | 0.07 |
| 5-B10_G     | 581.27                                                                 | 0.18 | 581.03 | 0.05 | 589.67  | 0.08 | 592.43      | 0.06 | 593.49     | 0.06 | 606.61      | 0.07 |
| 5-B10_H     | 581.81                                                                 | 0.17 | 581.43 | 0.05 | 590.47  | 0.08 | 592.94      | 0.10 | 594.15     | 0.05 | 609.03      | 0.08 |
| 23-B7_A     | 573.77                                                                 | 0.29 | 572.93 | 0.05 | 582.19  | 0.05 | 583.73      | 0.12 | 585.37     | 0.13 | 601.29      | 0.24 |
| 23-B7_B     | 575.29                                                                 | 0.12 | 574.07 | 0.05 | 583.23  | 0.07 | 585.20      | 0.07 | 586.70     | 0.07 | 602.24      | 0.06 |
| 23-B7_C     | 573.85                                                                 | 0.09 | 572.32 | 0.05 | 581.88  | 0.06 | 583.83      | 0.11 | 585.48     | 0.05 | 601.28      | 0.06 |
| 23-B7_D     | 574.37                                                                 | 0.10 | 572.79 | 0.05 | 582.08  | 0.05 | 584.43      | 0.08 | 585.87     | 0.06 | 601.43      | 0.05 |
| 23-B7_E     | 575.60                                                                 | 0.14 | 572.83 | 0.06 | 583.10  | 0.05 | 585.44      | 0.08 | 586.59     | 0.05 | 602.23      | 0.07 |

**Table S2.** Complete data of Bulk Sensing experiment for R-NPs/ITO.

| R-NPs/ITO array | Resonance position [nm] and corresponding uncertainty for liquids used |      |        |      |         |      |             |      |            |      |             |      |
|-----------------|------------------------------------------------------------------------|------|--------|------|---------|------|-------------|------|------------|------|-------------|------|
|                 | Methanol                                                               |      | H2O    |      | Ethanol |      | Acetic Acid |      | 2-propanol |      | Cyclohexane |      |
| 5-B10_A         | 591.08                                                                 | 0.19 | 591.34 | 0.05 | 599.96  | 0.09 | 601.41      | 0.30 | 601.37     | 0.05 | 615.07      | 0.34 |
| 5-B10_B         | 591.76                                                                 | 0.09 | 591.73 | 0.05 | 600.45  | 0.05 | 602.12      | 0.05 | 601.77     | 0.06 | 615.75      | 0.05 |
| 5-B10_C         | 592.29                                                                 | 0.11 | 592.09 | 0.05 | 600.82  | 0.06 | 602.68      | 0.05 | 602.37     | 0.06 | 616.37      | 0.05 |
| 5-B10_D         | 592.50                                                                 | 0.14 | 592.54 | 0.05 | 601.14  | 0.06 | 602.72      | 0.06 | 602.90     | 0.06 | 616.97      | 0.05 |
| 5-B10_E         | 591.06                                                                 | 0.09 | 590.46 | 0.05 | 599.46  | 0.06 | 601.07      | 0.05 | 601.09     | 0.05 | 615.20      | 0.15 |
| 5-B10_F         | 591.86                                                                 | 0.11 | 591.29 | 0.05 | 600.24  | 0.07 | 601.63      | 0.05 | 602.04     | 0.06 | 616.06      | 0.06 |
| 5-B10_G         | 592.51                                                                 | 0.11 | 592.00 | 0.05 | 600.62  | 0.05 | 601.32      | 0.05 | 602.36     | 0.06 | 616.00      | 0.17 |
| 5-B10_H         | 593.14                                                                 | 0.11 | 592.48 | 0.05 | 601.27  | 0.07 | 602.14      | 0.07 | 603.24     | 0.06 | 617.29      | 0.09 |
| 23-B7_A         | 581.91                                                                 | 0.39 | 582.03 | 0.05 | 590.26  | 0.33 | 592.30      | 0.08 | 590.56     | 0.27 | 605.20      | 0.35 |
| 23-B7_B         | 584.44                                                                 | 0.26 | 583.86 | 0.05 | 592.26  | 0.06 | 593.87      | 0.55 | 592.81     | 0.06 | 606.92      | 0.08 |
| 23-B7_C         | 583.15                                                                 | 0.22 | 577.94 | 0.05 | 586.70  | 0.28 | 592.92      | 0.39 | 591.21     | 0.05 | 605.54      | 0.09 |
| 23-B7_D         | 583.19                                                                 | 0.18 | 581.94 | 0.05 | 590.68  | 0.05 | 591.56      | 0.13 | 591.14     | 0.05 | 606.07      | 0.06 |
| 23-B7_E         | 581.20                                                                 | 0.31 | 577.15 | 0.06 | 587.57  | 0.05 | 590.23      | 0.06 | 590.60     | 0.05 | 604.45      | 0.20 |

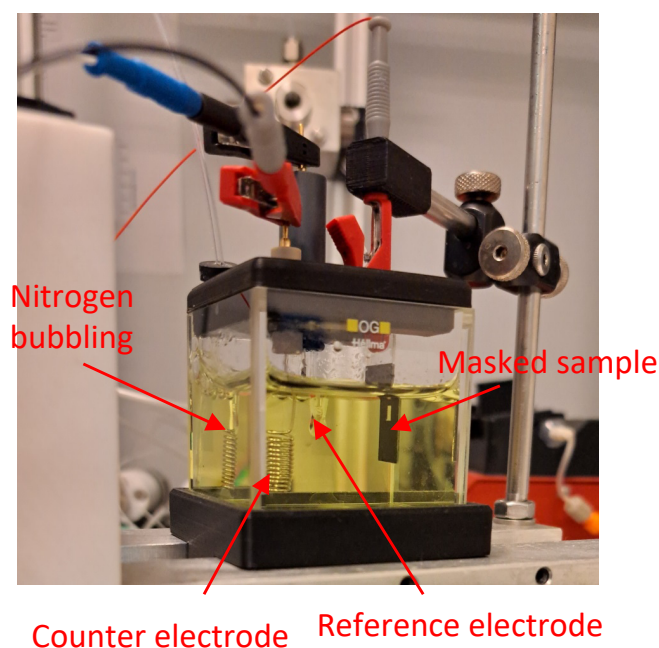

**Figure S1.** Image of the transparent electrochemical cell utilized for the characterization of the electrochemical behavior of ITO coated samples. Masked sample, counter and reference electrodes and N<sub>2</sub> bubbling system are indicated in the image.

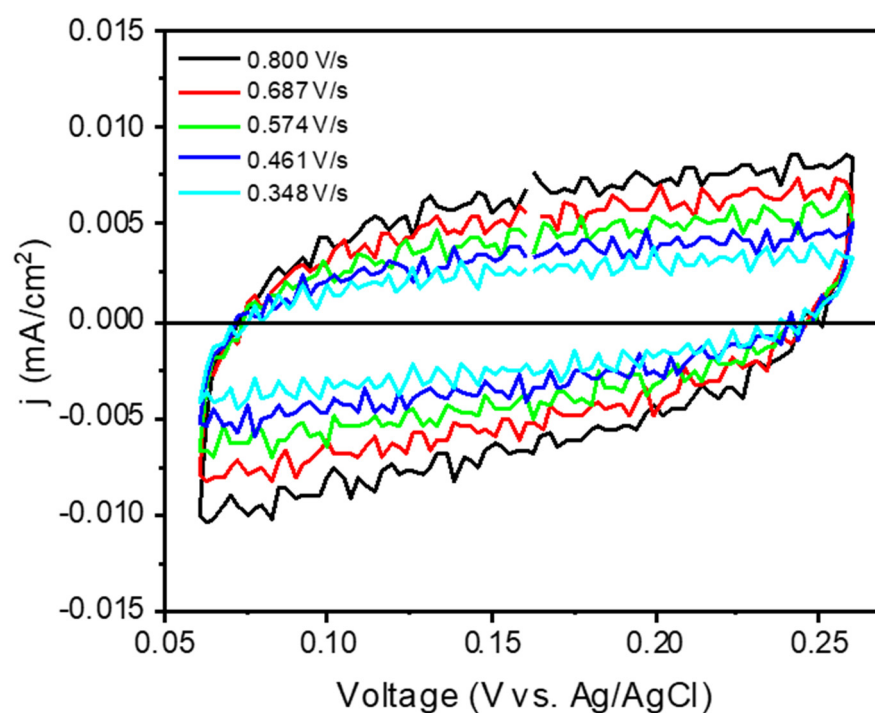

**Figure S2.** Voltograms as a function of the scan rate recorded for sample R-NPs/ITO to estimate the ECSA. Similar voltograms were also recorded for sample TF/ITO. Scan range was 0.05 and 0.25 V to avoid any Faradic contribution to the current signals and the medium was a phosphate solution, as indicated in the Materials and Methods section of the paper. ECSA values could be estimated according to the expressions:  $C_{dl} = d(\Delta j) / 2dV_d$  and  $ECSA = C_{dl} / C_s$ .

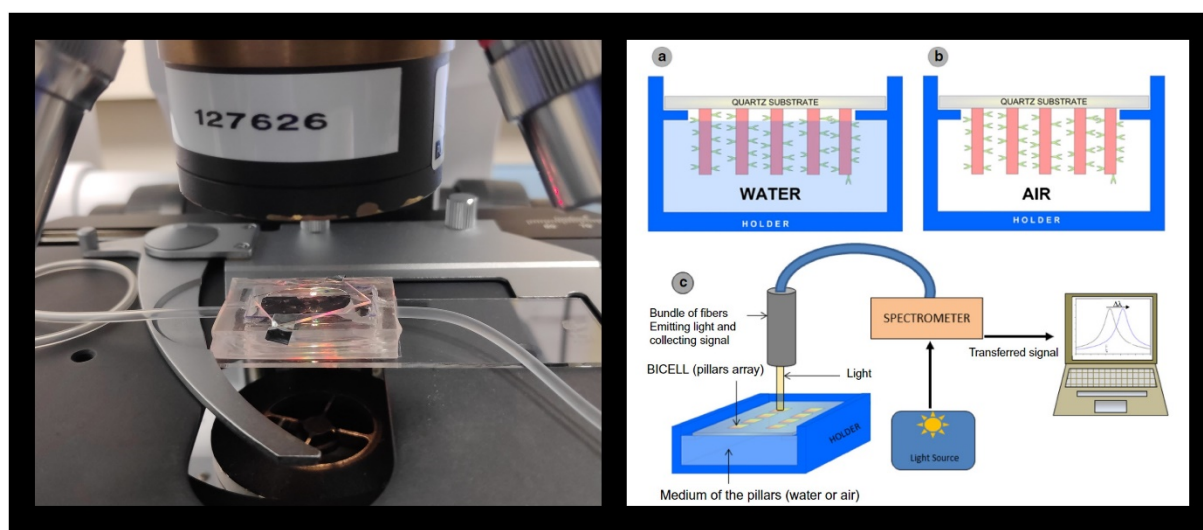

**Figure S3.** Optical measurement - picture of the experimental setup (left) and a schematic figure of the procedure (right, from [1]), including: (a) scheme of pillars immersed in water, (b) scheme of pillars in dry conditions, and (c) layout of the measurement system.

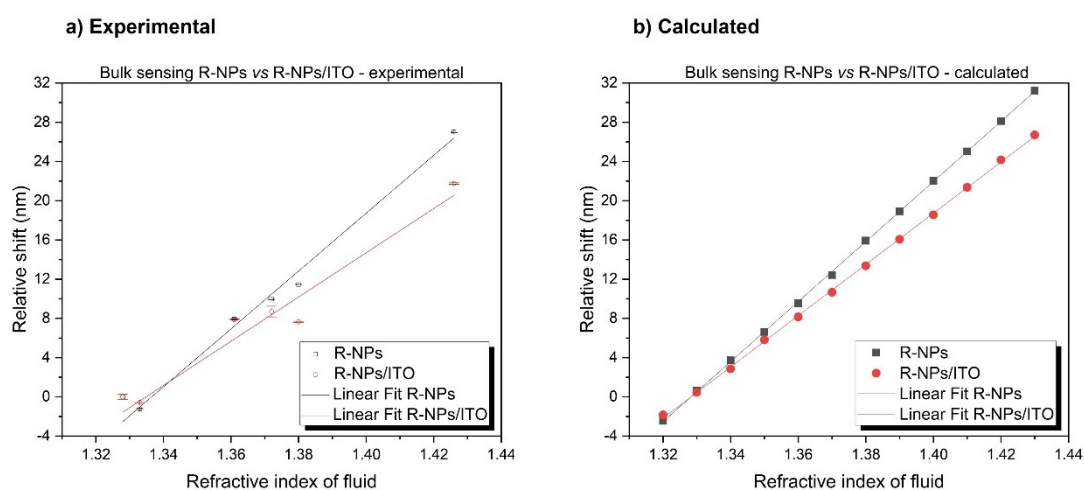

**Figure S4.** Resonance shift as a function of the fluids RI, before and after ITO deposition: (a) experimental data, (b) calculated results.

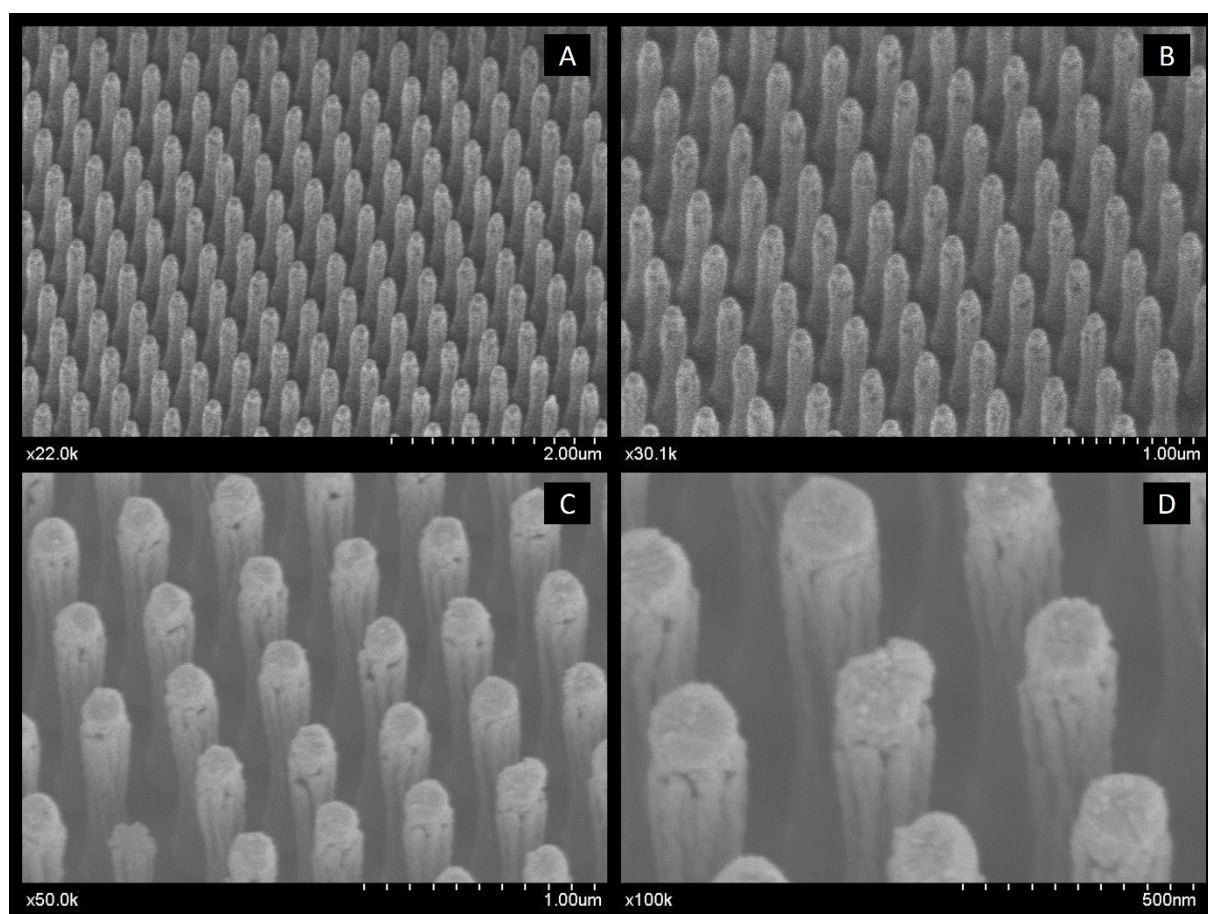

**Figure S5.** SEM imaging of R-NPs (A and B, before ITO deposition) and R-NPs/ITO (C and D, after ITO deposition). Both the increase in diameter and the change in shape directly suggest a correct deposition of ITO thin film on top of the nanostructures.

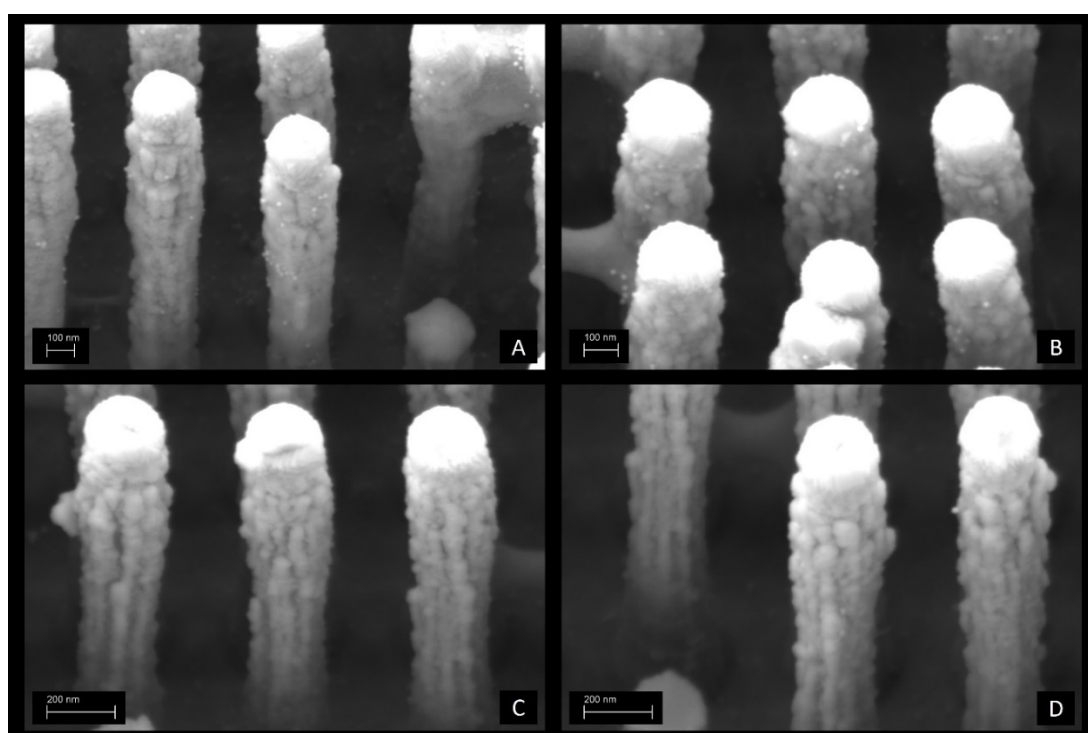

**Figure S6.** SEM imaging of arrays of R-NPs/ITO after Au-NPs deposition (A, B) and negative control (C, D) of biological detection experiment.
